# Supplementary material for: Cluster Randomized Trial of Duration of Cooling in Targeted Temperature Management After Resuscitation for Cardiac Arrest
Source: PubMed Central journal article supplement — Circ Rep. 2021 Jun 24;3(7):368–74. doi: 10.1253/circrep.CR-21-0062 (PMC8258184; doi:10.1253/circrep.cr-21-0062), 2021-06-24

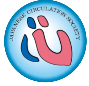

---

## **Cluster Randomized Trial of Duration of Cooling in Targeted Temperature Management After Resuscitation for Cardiac Arrest**

---

Yoshio Tahara, MD; Teruo Noguchi, MD; Naohiro Yonemoto, PhD; Takahiro Nakashima, MD; Satoshi Yasuda, MD; Migaku Kikuchi, MD; Katsutaka Hashiba, MD; Hideki Arimoto, MD; Kenji Nishioka, MD; Nobuaki Kokubu, MD; Takahiro Atsumi, MD; Kazunori Kashiwase, MD; Shunji Kasaoka, MD; Yasuhiro Kuroda, MD; Akiko Kada, BSc; Hiroyuki Yokoyama, MD; Hiroshi Nonogi, MD for the J-PULSE-Hypo-DC Trial Study Group

## Supplementary Figure

**J-PULSE-Hypo-DC Trial  
participating institutions**

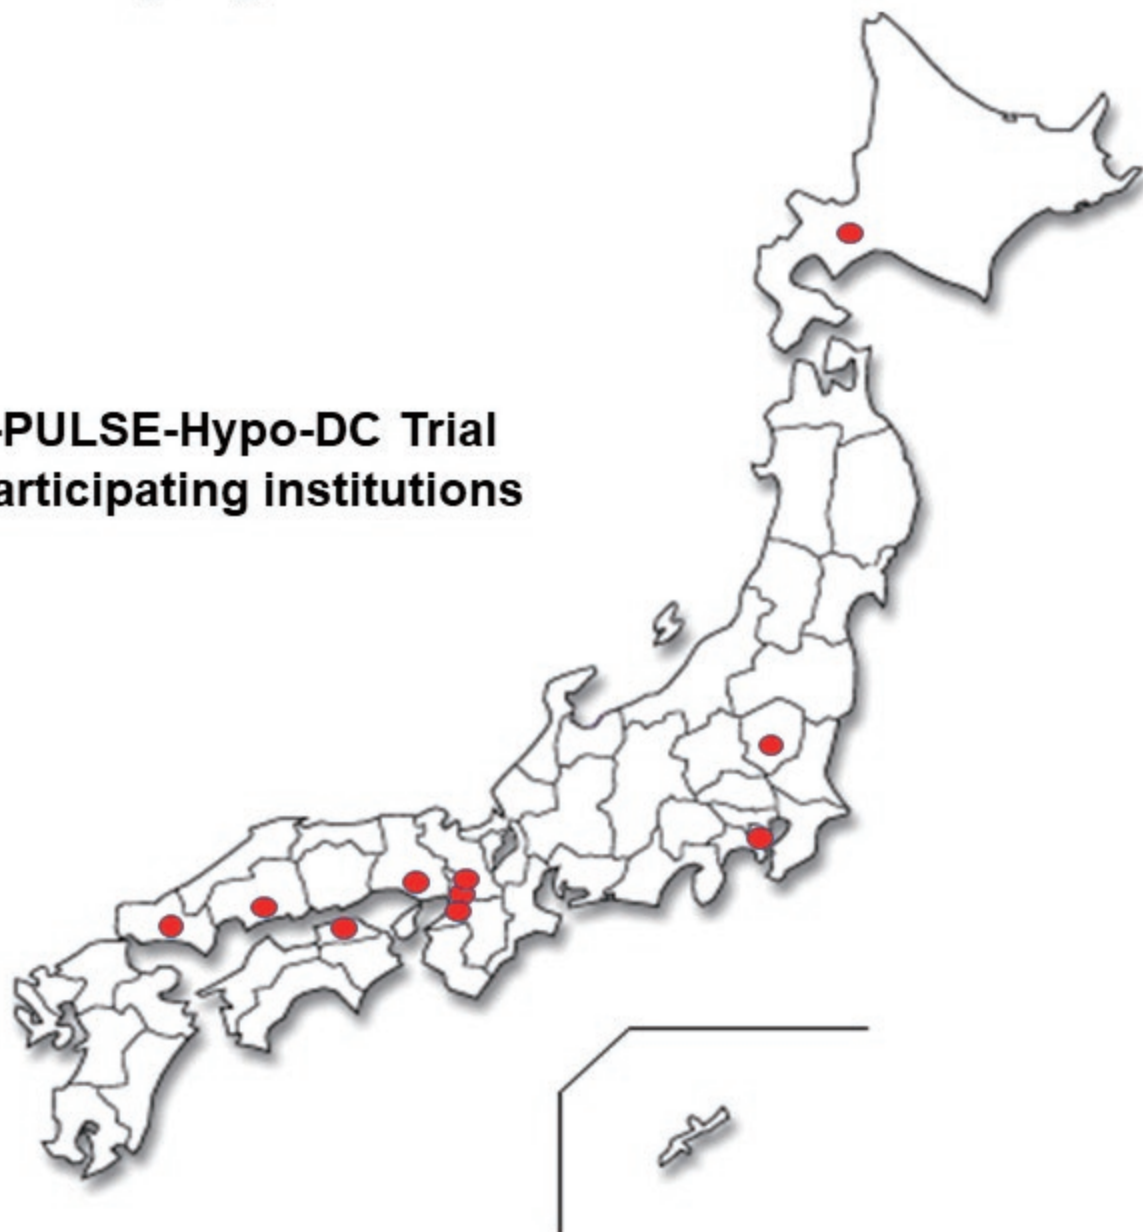

Supplement: circrep-3-368-s001.pdf [file circrep-3-368-s001.pdf]
